# Supplementary material for: Hydrophobic and flexible cellulose aerogel as an efficient, green and reusable oil sorbent
Source: Royal Society of Chemistry journal article supplement (doi:10.1039/c5ra15194e), 2015-01-01
Supplement: c5ra15194e3.pdf [file c5ra15194e3.pdf]

## Supporting Information for

# Hydrophobic and Flexible Cellulose Aerogel as an Efficient, Green and Reusable Oil Sorbent

Runjun Lin, Ang Li, Tingting Zheng, Lingbin Lu, Yang Cao

Key Lab of Advanced Materials of Tropical Island Resources, Ministry of Education, College of Materials and  
Chemical Engineering, Hainan University, Haikou 570228, Hainan, China

\*To whom all correspondence should be addressed. E-Mail: lulingbin@126.com (L. LU).

**Table S1.** Compressive strength of 2wt.% cellulose aerogels in different mediums.

| Mediums<br>Stress/Strain | Tap water | Air      | Pump Oil | Diesel   | Ethanol  |
|--------------------------|-----------|----------|----------|----------|----------|
| 60%                      | 3.27kPa   | 5.39kPa  | 5.46kPa  | 6.18kPa  | 8.61kPa  |
| 80%                      | 26.78kPa  | 15.72kPa | 95.46kPa | 26.45kPa | 29.07kPa |

**Table S2.** Adsorption capacity of 3wt.% modified cellulose aerogels.

| Oils                     | Diesel | Pump Oil | Peanut Oil |
|--------------------------|--------|----------|------------|
| Cm(g · g <sup>-1</sup> ) | 14.7   | 15.9     | 16.6       |

**Table S3.** Relative peak areas from deconvoluted C 1s spectra before and after hydrophobic modification.

|            | C 1     | C 2    | C 3    | C 4   |
|------------|---------|--------|--------|-------|
| Unmodified | 14.19%  | 41.51% | 38.31% | 5.99% |
| Modified   | 53.25 % | 39.95% | 5.24%  | 1.56% |

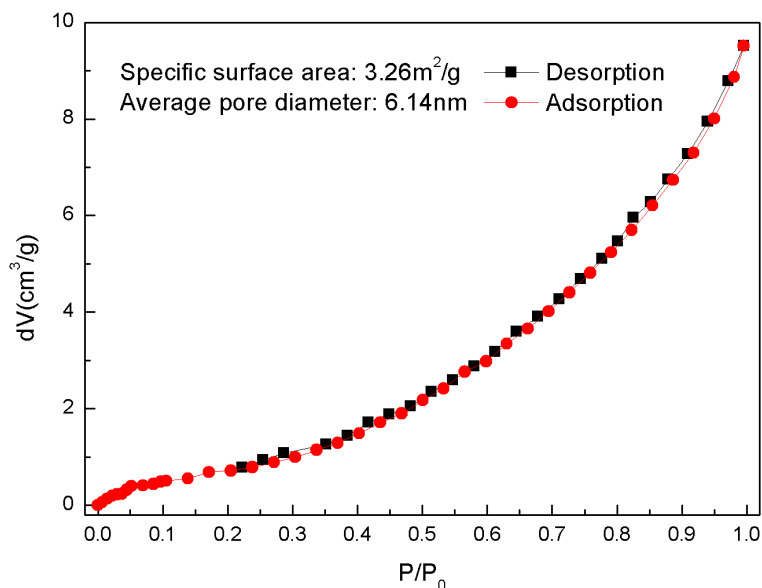

**Figure S1.** N<sub>2</sub> sorption isotherms of 3wt.% cellulose aerogels.\*

\*Notes: Nitrogen sorption isotherms were performed at -196°C on JK-BK112 Surface Area and Mesopore Size Analyzer from Beijing JWGB Sci & Tech Co., Ltd. The BET surface area was determined from an analysis of the isotherms in the relative pressure range of 0.01 to 0.35.

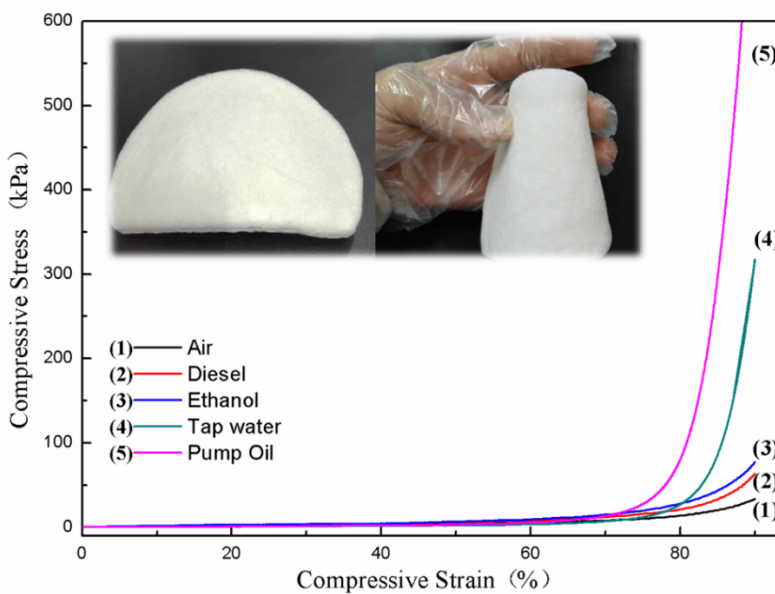

**Figure S2.** Compressive properties of 2wt.% cellulose aerogels in various mediums. The insert photograph indicated that cellulose aerogel was flexible (**Supplementary Video 1**).

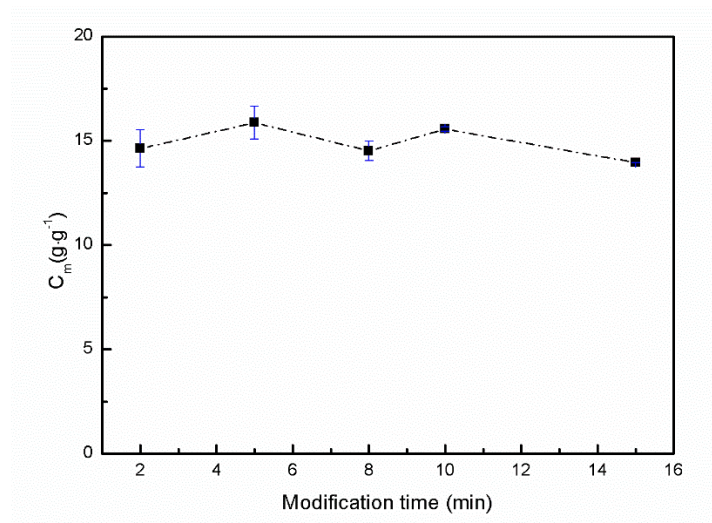

**Figure S3.** Diesel oil adsorption capacities versus different modification time.

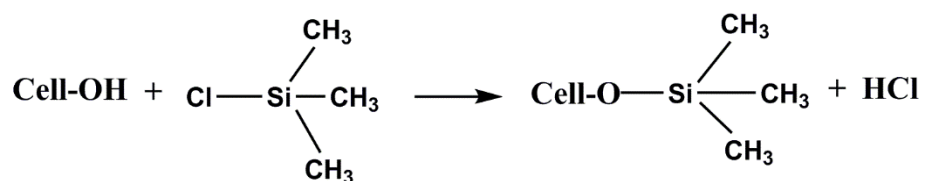

**Figure S4.** The silylation of cellulose with MTCS.

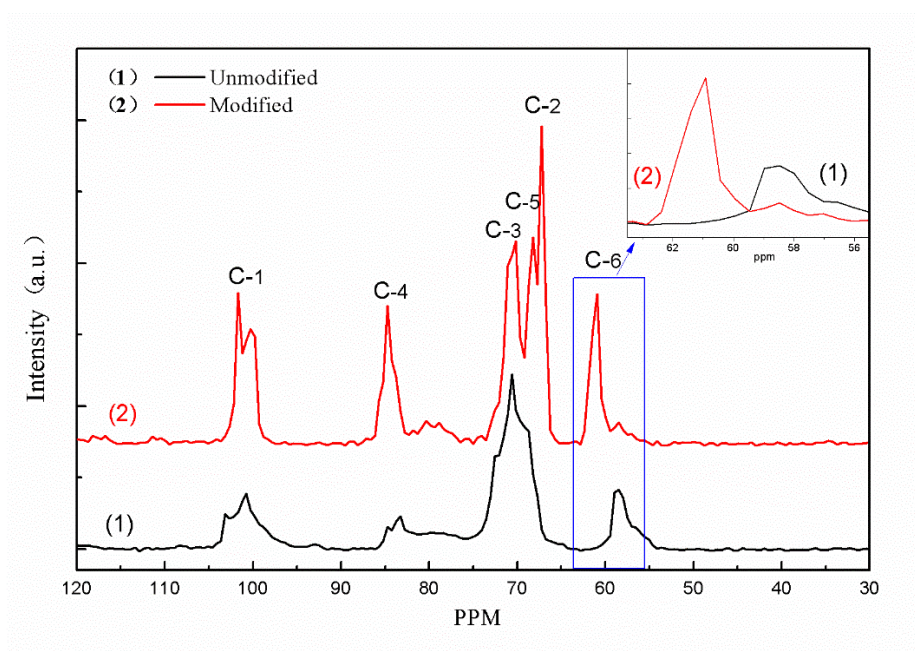

**Figure S5.** CP/MAS <sup>13</sup>C NMR spectra of cellulose aerogels before and after hydrophobic modification.
